# Supplementary material
Source: MDPI journal article supplement (https://www.mdpi.com/2311-7524/8/11/1023)
Supplement: s1 [file s1]

## Supplementary Material

### Supplementary Figures

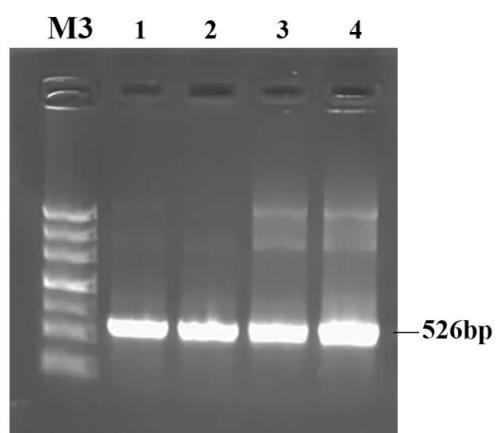

**Supplemental Figure S1.** Cloning the *LEA5* gene from *Saussurea involucrate*. Numbers 1-4 indicate the SiLEA5 gene cloned from *Saussurea involucrate*'s cDNA.

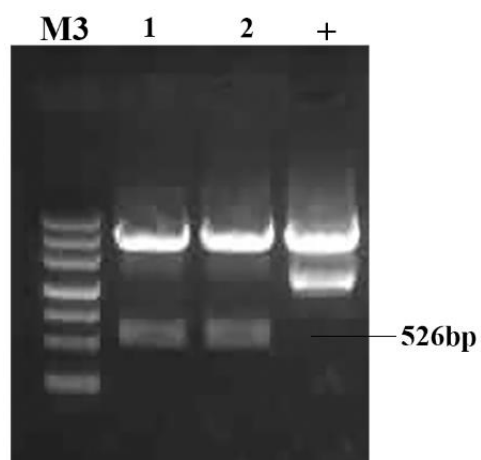

**Supplemental Figure S2.** Identification of recombinant plasmids by enzyme digestion. Numbers 1-2 indicate using BamH I and Sal I enzyme to identify recombinant plasmid. "+" the plasmid without adding BamH I and Sal I as control.

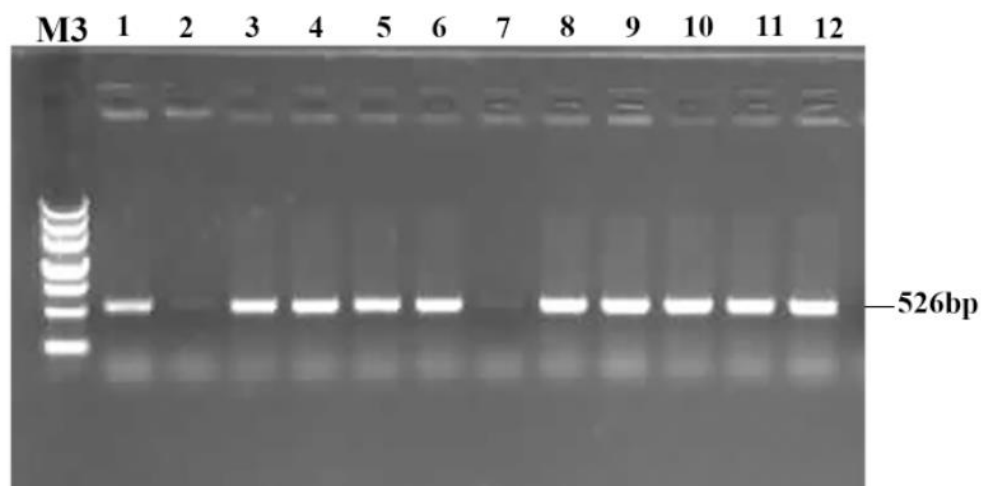

**Supplemental Figure S3.** Identification of *Agrobacterium tumefaciens* by PCR. Numbers 1-12 indicate monoclonal.

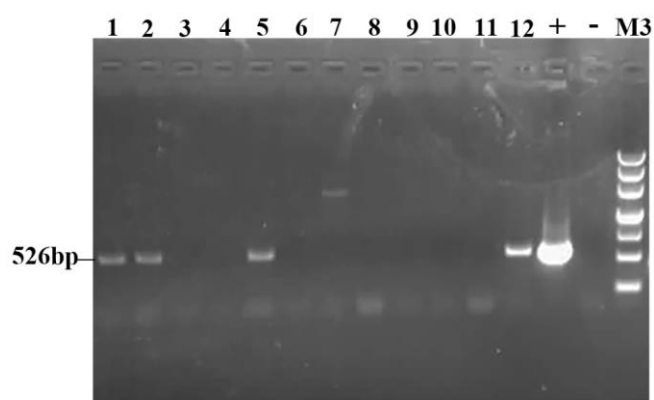

**Supplemental Figure S4.** Characterization of transgenic tomato through DNA PCR. Numbers 1-12 indicate individual transgenic plant lines, "+" the plasmid used as a positive control, and "-" the non-transgenic plants used as a negative control.

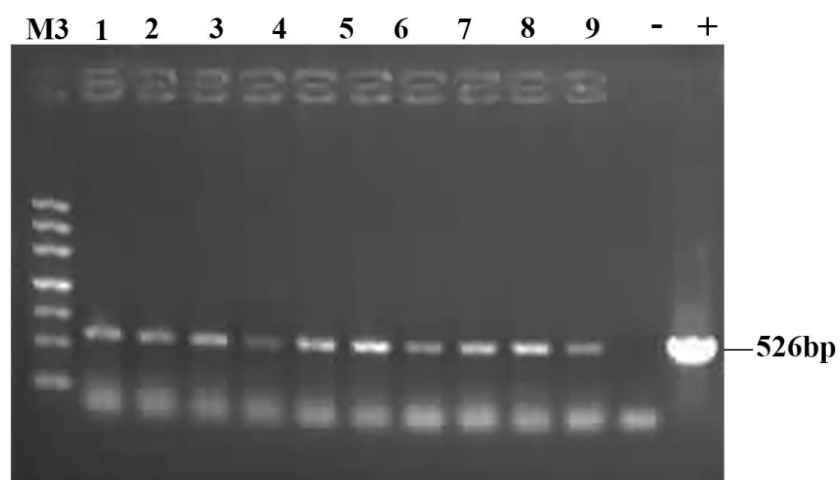

**Supplemental Figure S5.** Characterization of transgenic tomato expressing *SiLEA5*

through RT-PCR. Numbers 1-9 indicate individual transgenic plant lines, “+” the plasmid used as a positive control, and “-” the non-transgenic plants used as a negative control.

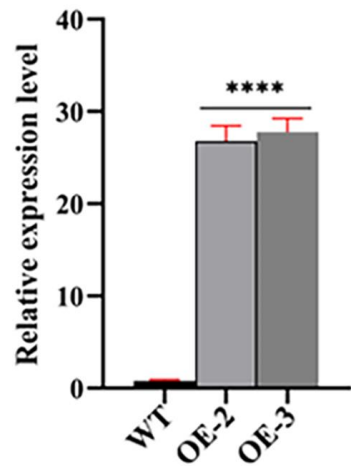

**Supplemental Figure S6.** Real-time PCR was used to detect wild type and transgenic tomatoes.

**Supplementary Table**

**Table S1.** List of primers used in this study.

| Primer name         | Primer sequence (5′–3′)  | Purpose |
|---------------------|--------------------------|---------|
| <i>SiLEA5</i> -F    | CCACCTATCAACTACAAAACCTC  | Cloning |
| <i>SiLEA5</i> -R    | TCCGCATAAACTACTGTTAGCT   | Cloning |
| <i>SiLEA5</i> -F(Q) | GGTCAGATTTGGACGCTAGAG    | qPCR    |
| <i>SiLEA5</i> -R(Q) | GATACCCTTCAGTTCCCAGC     | qPCR    |
| <i>GAPDH</i> -F(Q)  | TAGCAAGGATGCTCCCATGTTCGT | qPCR    |
| <i>GAPDH</i> -R(Q)  | AAAGGAGCAAGGCAGTTGGTTGTG | qPCR    |
